# Supplementary material for: Misconceptions and Rumors about Ebola Virus Disease in Sub-Saharan Africa: A Systematic Review
Source: MDPI journal article supplement (doi:10.3390/ijerph19084714), 2022-04-13
Supplement: s1 [file s1]

# Supplementary Materials

**Supplementary Table S1.** Quality assessment of included studies (*n* = 13).

| Introduction           |                            |                        | Methods               |                                   |                                                                                                      | Results                                                       |                            |                                                           | Discussion                  |                       | Score |
|------------------------|----------------------------|------------------------|-----------------------|-----------------------------------|------------------------------------------------------------------------------------------------------|---------------------------------------------------------------|----------------------------|-----------------------------------------------------------|-----------------------------|-----------------------|-------|
| First author (year)    | Objectives clearly defined | Study design explained | Sample size justified | Target population clearly defined | Outcome variables measured correctly using instruments that had been piloted or previously published | Methods (including statistical methods) sufficiently reported | Ethical clearance reported | Results reported in accordance with the described methods | Results relevance discussed | Limitations discussed |       |
| Claude (2018) [16]     | 1                          | 1                      | 0                     | 1                                 | 1                                                                                                    | 1                                                             | 1                          | 1                                                         | 1                           | 1                     | 9     |
| Winters (2018)[17]     | 1                          | 1                      | 0                     | 1                                 | 1                                                                                                    | 1                                                             | 1                          | 1                                                         | 1                           | 1                     | 9     |
| Tenkorang (2018)[18]   | 1                          | 1                      | 0                     | 0                                 | 1                                                                                                    | 0                                                             | 1                          | 0                                                         | 0                           | 0                     | 9     |
| Jalloh (2017)[21]      | 1                          | 1                      | 1                     | 1                                 | 1                                                                                                    | 1                                                             | 1                          | 1                                                         | 1                           | 1                     | 10    |
| Jalloh (2017)[20]      | 1                          | 1                      | 1                     | 1                                 | 1                                                                                                    | 1                                                             | 0                          | 1                                                         | 1                           | 1                     | 9     |
| Jalloh (2017)[19]      | 1                          | 1                      | 0                     | 1                                 | 0                                                                                                    | 1                                                             | 1                          | 1                                                         | 1                           | 1                     | 8     |
| Mohamed (2017)[22]     | 1                          | 1                      | 0                     | 1                                 | 1                                                                                                    | 1                                                             | 1                          | 1                                                         | 1                           | 0                     | 8     |
| Nyakarahuka (2017)[29] | 1                          | 1                      | 1                     |                                   | 1                                                                                                    | 1                                                             | 1                          | 1                                                         | 1                           | 1                     | 10    |
| Jiang (2016)[23]       | 1                          | 1                      | 0                     | 1                                 | 0                                                                                                    | 0                                                             | 1                          | 1                                                         | 1                           | 1                     | 7     |
| Iliyasu (2015)[25]     | 1                          | 1                      | 0                     | 1                                 | 1                                                                                                    | 1                                                             | 1                          | 1                                                         | 1                           | 1                     | 9     |
| Buli (2015)[26]        | 1                          | 1                      | 1                     | 1                                 | 0                                                                                                    | 1                                                             | 1                          | 1                                                         | 0                           | 0                     | 7     |
| Gidado (2015)[27]      | 1                          | 1                      | 1                     | 1                                 | 0                                                                                                    | 1                                                             | 0                          | 1                                                         | 1                           | 0                     | 7     |
| Kobayashi (2015)[28]   | 1                          | 1                      | 0                     | 1                                 | 1                                                                                                    | 1                                                             | 1                          | 1                                                         | 1                           | 0                     | 8     |

A score “1” was given for each reported item. Scores were classified as high (8-10), moderate (5-7), or of low quality (≤4).

**Supplementary Table S2.** Methodological assessment of included studies with qualitative design using a modified CASP tool (*n* = 3).

| First author (year) | Was There a Clear Statement of the Aims of the Research? | Is a Qualitative Methodology Appropriate? | Was the Research Design Appropriate to Address the Aims of the Research? | Was the Recruitment Strategy Appropriate to the Aims of the Research? | Was the Data Collected in a Way that Addressed the Research Issue? | Have Ethical Issues Been Taken into Consideration? | Was the Data Analysis Sufficiently Rigorous? | Is There a Clear Statement of Findings? | Is the Research Valuable? |
|---------------------|----------------------------------------------------------|-------------------------------------------|--------------------------------------------------------------------------|-----------------------------------------------------------------------|--------------------------------------------------------------------|----------------------------------------------------|----------------------------------------------|-----------------------------------------|---------------------------|
| Adongo (2016)[24]   | Yes                                                      | Yes                                       | Yes                                                                      | Yes                                                                   | Yes                                                                | Yes                                                | Yes                                          | Yes                                     | Yes                       |
| Claude (2018)[16]   | Yes                                                      | Yes                                       | Yes                                                                      | Yes                                                                   | Yes                                                                | Yes                                                | Yes                                          | Yes                                     | Yes                       |

CASP= Critical Appraisal Skills Programme

## References

16. Claude, K.M.; Underschultz, J.; Hawkes, M.T. Ebola virus epidemic in war-torn eastern DR Congo. *Lancet* **2018**, *392*, 1399–1401, doi:10.1016/s0140-6736(18)32419-x.

17. Winters, M.; Jalloh, M.F.; Sengeh, P.; Jalloh, M.B.; Conteh, L.; Bunnell, R.; Li, W.; Zeebari, Z.; Nordenstedt, H. Risk communication and Ebola-specific knowledge and behavior during 2014–2015 outbreak, Sierra Leone. *Emerg. Infect. Dis.* **2018**, *24*, 336–344. <https://doi.org/10.3201/eid2402.171028>.

18. Tenkorang, E.Y. Effect of knowledge and perceptions of risks on Ebola-preventive behaviours in Ghana. *Int. Health* **2018**, *10*, 202–210. <https://doi.org/10.1093/inthealth/ihy009>.

19. Jalloh, M.F.; Sengeh, P.; Monasch, R.; Jalloh, M.B.; DeLuca, N.; Dyson, M.; Golfa, S.; Sakurai, Y.; Conteh, L.; Sesay, S.; et al. National survey of Ebola-related knowledge, attitudes and practices before the outbreak peak in Sierra Leone: August 2014. *BMJ Glob. Health* **2017**, *2*, e000285. <https://doi.org/10.1136/bmjgh-2017-000285>.

20. Jalloh, M.F.; Robinson, S.J.; Corker, J.; Li, W.; Irwin, K.; Barry, A.M.; Ntuba, P.N.; Diallo, A.A.; Jalloh, M.B.; Nyuma, J.; et al. Knowledge, attitudes, and practices related to Ebola virus disease at the end of a national epidemic—Guinea, August 2015. *MMWR Morb. Mortal. Wkly. Rep.* **2017**, *66*, 1109–1115. <https://doi.org/10.15585/mmwr.mm6641a4>.

21. Jalloh, M.F.; Bunnell, R.; Robinson, S.; Jalloh, M.B.; Barry, A.M.; Corker, J.; Sengeh, P.; VanSteelant, A.; Li, W.; Dafaie, F.; et al. Assessments of Ebola knowledge, attitudes and practices in Forecariah, Guinea and Kambia, Sierra Leone, July–August 2015. *Philos. Trans. R. Soc. Lond. B Biol. Sci.* **2017**, *372*, 20160304. <https://doi.org/10.1098/rstb.2016.0304>.

22. Mohamed, M.M.G.; Shwaib, H.M.; Fahim, M.M.; Ahmed, E.A.; Omer, M.K.; Monier, I.A.; Balla, S.A. Ebola hemorrhagic fever under scope, view of knowledge, attitude and practice from rural Sudan in 2015. *J. Infect. Public Health* **2017**, *10*, 287–294. <https://doi.org/10.1016/j.jiph.2016.05.016>.

23. Jiang, H.; Shi, G.Q.; Tu, W.X.; Zheng, C.J.; Lai, X.H.; Li, X.X.; Wei, Q.; Li, M.; Deng, L.Q.; Huo, X.; et al. Rapid assessment of knowledge, attitudes, practices, and risk perception related to the prevention and control of Ebola virus disease in three communities of Sierra Leone. *Infect. Dis. Poverty* **2016**, *5*, 53. <https://doi.org/10.1186/s40249-016-0142-9>.

24. Adongo, P.B.; Tabong, P.T.; Asampong, E.; Ansong, J.; Robalo, M.; Adanu, R.M. Beyond knowledge and awareness: Addressing misconceptions in Ghana's preparation towards an outbreak of Ebola virus disease. *PLoS ONE* **2016**, *11*, e0149627. <https://doi.org/10.1371/journal.pone.0149627>.

25. Iliyasu, G.; Ogoina, D.; Otu, A.A.; Dayyab, F.M.; Ebenso, B.; Otokpa, D.; Rotifa, S.; Olomo, W.T.; Habib, A.G. A Multi-site knowledge attitude and practice survey of Ebola virus disease in Nigeria. *PLoS ONE* **2015**, *10*, e0135955. <https://doi.org/10.1371/journal.pone.0135955>.
26. Buli, B.G.; Mayigane, L.N.; Oketta, J.F.; Soumouk, A.; Sandouno, T.E.; Camara, B.; Toure, M.S.; Conde, A. Misconceptions about Ebola seriously affect the prevention efforts: KAP related to Ebola prevention and treatment in Kouroussa Prefecture, Guinea. *Pan Afr. Med. J.* **2015**, *22* (Suppl. 1), 11. <https://doi.org/10.11694/pamj.suppl.2015.22.1.6269>.
27. Gidado, S.; Oladimeji, A.M.; Roberts, A.A.; Nguku, P.; Nwangwu, I.G.; Waziri, N.E.; Shuaib, F.; Oguntimehin, O.; Musa, E.; Nzuki, C.; et al. Public knowledge, perception and source of information on Ebola virus disease—Lagos, Nigeria; September, 2014. *PLoS Curr.* **2015**, *7*, ecurrents.outbreaks.0b805cac244d700a47d6a3713ef2d6db. <https://doi.org/10.1371/currents.outbreaks.0b805cac244d700a47d6a3713ef2d6db>.
28. Kobayashi, M.; Beer, K.D.; Bjork, A.; Chatham-Stephens, K.; Cherry, C.C.; Arzoaquoi, S.; Frank, W.; Kumeh, O.; Sieka, J.; Yeiah, A.; et al. Community knowledge, attitudes, and practices regarding Ebola virus disease—Five counties, Liberia, September–October, 2014. *MMWR Morb. Mortal. Wkly. Rep.* **2015**, *64*, 714–718.
29. Nyakarahuka, L.; Skjerve, E.; Nabadda, D.; Sitali, D.C.; Mumba, C.; Mwiine, F.N.; Lutwama, J.J.; Balinandi, S.; Shoemaker, T.; Kankya, C. Knowledge and attitude towards Ebola and Marburg virus diseases in Uganda using quantitative and participatory epidemiology techniques. *PLoS Negl. Trop. Dis.* **2017**, *11*, e0005907. <https://doi.org/10.1371/journal.pntd.0005907>.
